# Supplementary material
Source: PubMed Central journal article supplement (PMC3147603)
Supplement: supp_31_15_3182__1.pdf [file supp_31_15_3182__1.pdf]

## Supplementary Table: Primer Sequences

### Bisulphite Sequencing

|                  |                           |
|------------------|---------------------------|
| MmMCT1_BSP+1_F   | GTGTAGGTGTAGTAGTTAAGGAGTT |
| MmMCT1_BSP+1_R   | TCAAAATCCCCTTCACCC        |
| MmMCT1_BSP+2_F   | TGGGTGAAGGGGATTTTG        |
| MmMCT1_BSP+2_R   | CTAACAAATCACCTAATAAAACACC |
| MmMCT1_BSP_Int1F | TAGTTTTGTTTTTGTATTTTAGGT  |
| MmMCT1_BSP_Int1R | AAACTCTCCTCTATAAAATCCC    |

### Cloning MCT1 3'UTRs

|               |                                      |
|---------------|--------------------------------------|
| MmMCT1_3UTR_F | TATTCTAGACCTGTGAAGCCTGGAGAG          |
| MmMCT1_3UTR_R | AAAGGATCCAGGCATGCTAATGTGGAGGAGGTCTTC |
| HsMCT1_3UTR_F | AAAAGTATCCATGGGGCTGAAGGG             |
| HsMCT1_3UTR_R | AAAGGATCCCCTCACTCCACTAACAAG          |

### Cloning miRs

|                 |                                     |
|-----------------|-------------------------------------|
| mmu-mir-124-2_F | cgcagatctCGATCCATGTCATCATTGAA       |
| mmu-mir-124-2_R | cgcgctagcTATTTGGAAAAGGCCAGCAC       |
| mmu-mir-183_F   | cgcggatccGGGTGATGGTATTGGGATGT       |
| mmu-mir-183_R   | cgctctagaGACACACAGACCCTGGGATG       |
| mmu-mir-29b-2_F | cgcggatccGACACTATGCATCTTGGGAAA      |
| mmu-mir-29b-2_R | cgctctagaGCTCTTACCCCTTCCTTGCT       |
| mmu-mir-377_F   | gcgggatccAGACTTGGTGTCCGTGTGCT       |
| mmu-mir-377_R   | gcgtctagaAGAACAGCGAGTGTGTCTGC       |
| mmu-mir-9-2_F   | cgcggatccCAACAGCTTGCTGCACCTTA       |
| mmu-mir-9-2_R   | cgctctagaTGTAACGTTTGCTTCAAAATGA     |
| mmu-mir-375_F   | cgcggatccGGGACTGAACTGGCAGTATAAGAG   |
| mmu-mir-375_R   | gggtctagaCTCTGGGACAGAGCAGGACT       |
| mmu-mir-320_F   | cgcggatccGCTGCAGCTCAGCTCCTC         |
| mmu-mir-320_R   | cgctctagaCAATGACCACGCCAAGGT         |
| mmu-mir-29c_F   | cgcggatccTGAGAAAGTTTTGTGTTTCAAGATG  |
| mmu-mir-29c_R   | cgctctagaGATAAACAGACATGATAGATTGAATG |
| mmu-mir29a_F    | cgcggatccGCACCATTTGAAATCAGTGTTTC    |

|                |                               |
|----------------|-------------------------------|
| mmu-mir29a_R   | cgctctagaTATCCCCTGCTCCTCTCACA |
| mmu-mir-7a-2_F | cgcgatccgtccacctgcttcccgtag   |
| mmu-mir-7a-2_R | agcctcgggtggtggtctct          |

### miR RT-PCR

#### miR RT Primers

|                |                                                     |
|----------------|-----------------------------------------------------|
| mmu-mir-7a-RT  | GTCGTATCCAGTGCAGGGTCCGAGGTATTCGCACTGGATACGACACAACA  |
| mmu-miR-29a-RT | GTCGTATCCAGTGCAGGGTCCGAGGTATTCGCACTGGATACGACTAACCG  |
| mmu-miR-29b-RT | GTCGTATCCAGTGCAGGGTCCGAGGTATTCGCACTGGATACGACAACACT  |
| mmu-miR-29c-RT | GTCGTATCCAGTGCAGGGTCCGAGGTATTCGCACTGGATACGACTAACCG  |
| mmu-miR-183-RT | GTCGTATCCAGTGCAGGGTCCGAGGTATTCGCACTGGATACGACAGTGAA  |
| mmu-miR-9-RT   | GTCGTATCCAGTGCAGGGTCCGAGGTATTCGCACTGGATACGACTCATAAC |
| mmu-miR-9*-RT  | GTCGTATCCAGTGCAGGGTCCGAGGTATTCGCACTGGATACGACTTTTC   |
| mmu-miR-320-RT | GTCGTATCCAGTGCAGGGTCCGAGGTATTCGCACTGGATACGACTCGCCC  |
| mmu-miR-375-RT | GTCGTATCCAGTGCAGGGTCCGAGGTATTCGCACTGGATACGACctcacgc |
| mmu-miR-124-RT | GTCGTATCCAGTGCAGGGTCCGAGGTATTCGCACTGGATACGACCggcatt |

#### miR Forward PCR Primers

|               |                         |
|---------------|-------------------------|
| mmu-mir-7a-F  | gccgccTGAAGACTAGTGATTT  |
| mmu-miR-29a-F | gccgccTAGCACCATCTGAAAT  |
| mmu-miR-29b-F | gccgccTAGCACCATTTGAAATC |
| mmu-miR-29c-F | gccgccTAGCACCATTTGAAAT  |
| mmu-miR-183-F | gccgccTATGGCACTGGTAGAA  |
| mmu-miR-9*-F  | gccgccATAAAGCTAGATAACC  |
| mmu-miR-320-F | gccgccAAAAGCTGGGTTGAGA  |
| mmu-miR-375-F | GGCGTTTGTTCGTTTCGGCTC   |
| mmu-miR-124-F | GGAGGTAAGGCACGCGGTG     |

#### Common miR Reverse Primer

|       |                     |
|-------|---------------------|
| miR-R | CCAGTGCAGGGTCCGAGGT |
|-------|---------------------|

#### Primers for mutating miR binding sites in MmMCT1 3'UTR

|                   |                                             |
|-------------------|---------------------------------------------|
| MmMCT1-3-124mut-F | ataGATATCagttttagtttttagaactcttttagagagcctt |
|-------------------|---------------------------------------------|

MmMCT1-3-124mut-R cccGATATCatattataatcttcatgacactgttaaagctaag  
MmMCT1-3-29mut-F cccGATATCcagtgacagacagtgacatttgtgtgg  
MmMCT1-3-29mut-R cccGATATCtgtagactagaggccagcagatggt

#### **qRT-PCR**

##### **Primers for detecting *Mct1* and Cyclophilin A (*PPIA*)**

MmMCT1\_qPCR GTGTTATTGGAGGTCTTGGG  
MmMCT1\_qPCR AAGAAAGCCTGATTAAGTGGAG  
MmPPIA\_qPCR AACTGAATGGCTGGATGG  
MmPPIA\_qPCR CTACAGAAGGAATGGTTTGATGG
